# Supplementary material for: Reversible dispersion–precipitation of single-walled carbon nanotubes by pH change and addition of organic components
Source: Royal Society of Chemistry journal article supplement (doi:10.1039/c3nj00749a), 2013-01-01
Supplement: c3nj00749a.pdf [file c3nj00749a.pdf]

## Electronic Supplementary Information

### Reversible dispersion-precipitation of single-walled carbon nanotubes using pH change and addition of organic component

*Yoshiro Imura, Clara Morita and Takeshi Kawai\**

Department of Industrial Chemistry, Tokyo University of Science  
1-3, Kagurazaka, Shinjuku-ku, Tokyo, 162-8601, Japan

[kawai@ci.kagu.tus.ac.jp](mailto:kawai@ci.kagu.tus.ac.jp)

#### **Synthesis of C18AA**

10.22 g (0.12 mol) of methyl acrylate was added to 2.0 g (7.12 mmol) of octadecylamine in 15 mL of methanol. The solution was stirred at 40 °C for 3 days and the solvents and excess methyl acrylate were then removed by rotary evaporation. 3-[(2-Methoxycarbonyl-ethyl)-octadecyl-amino]-propionic acid methyl ester (C18ME) was obtained as a viscous liquid. C18ME (3.2 g) and ethylenediamine (17.8 g, 0.30 mol) were dissolved in 15 mL of methanol and the mixture was stirred for 1 week at room temperature. C18AA was obtained as a light yellow solid upon removal of the solvent and ethylenediamine by evaporation and freeze-drying. The crude solid was recrystallized from a mixed solvent of toluene and methanol. Yield: 90%.

<sup>1</sup>H NMR (CDCl<sub>3</sub>): δ 0.88 (t, 3H, CH<sub>3</sub>), 1.25 (br, 28H, CH<sub>2</sub>), 1.45 (br, 4H, CH<sub>2</sub>CH<sub>3</sub>, CH<sub>2</sub>CH<sub>2</sub>CH<sub>2</sub>N), 2.36 (t, 4H, CH<sub>2</sub>CH<sub>2</sub>O), 2.42 (t, 2H, CH<sub>2</sub>N), 2.73 (t, 4H, NCH<sub>2</sub>CH<sub>2</sub>CO), 2.82 (t, 4H, CH<sub>2</sub>NH<sub>2</sub>), and 3.29 (q, 4H, NHCH<sub>2</sub>). HRMS: Calcd for C18AA (M+H<sup>+</sup>): 498.47; Found: 498.48.

**Optical microscopic images**

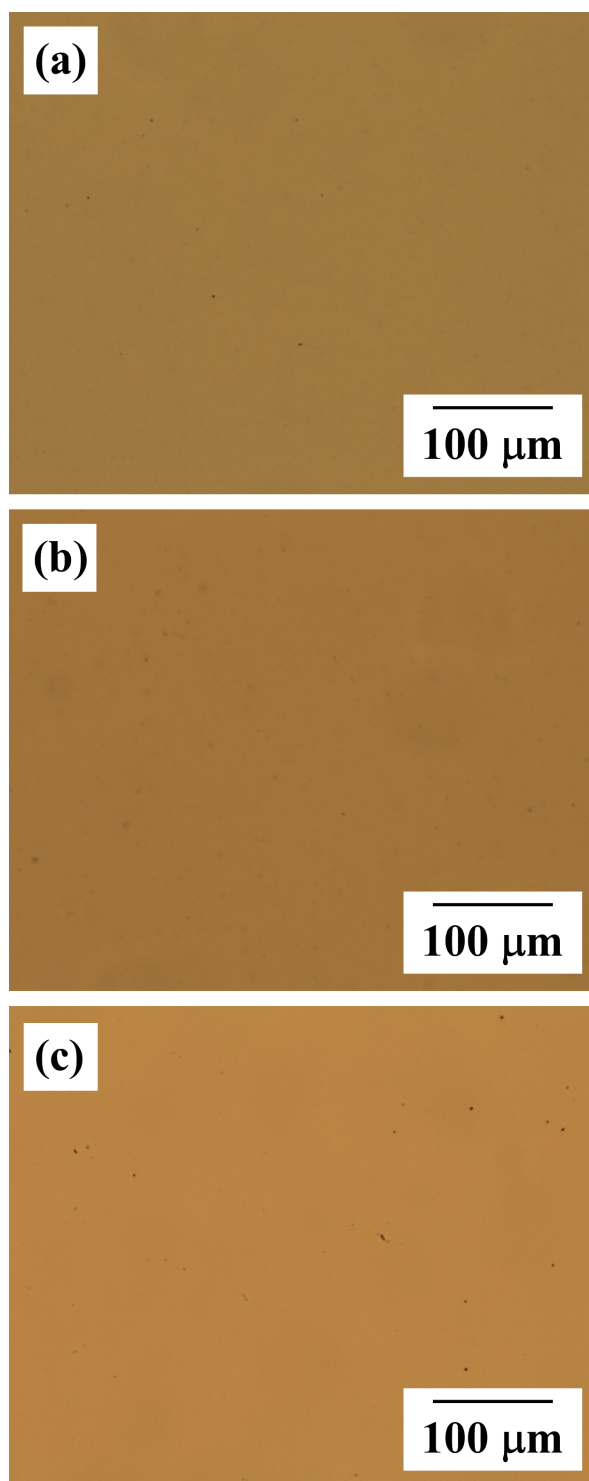

**Figure S1.** Optical micrographs of (a) SWCNTs dispersion in 2wt% C18AA aqueous solution at Figure 1, (b) re-dispersed SWCNTs dispersion at Figure 7e, and (c) re-dispersed SWCNTs dispersion at Figure 8e. The sample thickness was 150 μm.
